# Supplementary material
Source: MDPI journal article supplement (https://www.mdpi.com/1999-4907/7/4/74)
Supplement: s1 [file s1]

Supplementary Materials: Sub-Soiling and Genotype Selection Improves *Populus* Productivity Grown on a North Carolina Sandy Soil

Shawn Dayson Shifflett, Dennis W. Hazel and Elizabeth Guthrie Nichols

**Table S1.** Mean relative percent difference and one standard deviation (SD) for duplicate parameter measurements collected. LAI, Leaf Area Index.

| **Parameter** | ***n*** | **Relative Percent Difference** | |
| --- | --- | --- | --- |
| **Mean** | **SD** |
| Height | 59 | 1.7% | 5.7% |
| Basal Diameter | 59 | 5.4% | 14% |
| Diameter at Breast Height | 59 | 2.5% | 5.6% |
| LAI | 4 | 7.1% | 6.2% |
| % Nitrogen | 8 | 7.0% | 5.0% |
| Chlorophyll Content | 8 | 15% | 17% |

**Table S2.** Number of planted trees, number of living trees, percent survival, percent mortality, mean height and one standard deviation (SD), mean basal diameter and SD, total volume, and mean volume and SD for trees planted in April 2014. Means are listed by overall performance (combined), and then partitioned by soil tillage treatment.

| **Parent Species** |  | **Total Planted** |  |  |  | **Height (m)** | | **DBH (cm)** | | **Volume (dm3)** | | |
| --- | --- | --- | --- | --- | --- | --- | --- | --- | --- | --- | --- | --- |
| **Genotype** | **Treatment** | **Alive** | **Survival** | **Mortality** | **Mean** | **SD** | **Mean** | **SD** | **Total** | **Mean** | **SD** |
| *P. deltoides* | Combined | 384 | 305 | 79% | 21% | 5.9 | 1.4 | 5.4 | 2.2 | 8533 | 33 | 20 |
|  | Disked | 192 | 137 | 71% | 29% | 5.7 | 1.3 | 5.0 | 2.1 | 3398 | 29 | 17 |
|  | Sub-soiled | 192 | 168 | 88% | 13% | 6.1 | 1.4 | 5.7 | 2.2 | 5135 | 28 | 21 |
| 140 | Combined | 96 | 78 | 81% | 19% | 6.1 | 1.3 | 6.3 | 2.1 | 2597 | 25 | 18 |
|  | Disked | 48 | 39 | 81% | 19% | 6.0 | 1.2 | 5.7 | 2.1 | 1126 | 31 | 23 |
|  | Sub-soiled | 48 | 39 | 81% | 19% | 6.2 | 1.4 | 6.8 | 2.0 | 1471 | 38 | 22 |
| 176 | Combined | 96 | 77 | 80% | 20% | 5.8 | 1.3 | 5.5 | 2.1 | 2328 | 30 | 22 |
|  | Disked | 48 | 35 | 73% | 27% | 5.7 | 1.3 | 5.5 | 2.4 | 1040 | 30 | 23 |
|  | Sub-soiled | 48 | 42 | 88% | 13% | 5.9 | 1.3 | 5.5 | 1.8 | 1288 | 31 | 21 |
| 356 | Combined | 96 | 82 | 85% | 15% | 6.5 | 1.2 | 5.3 | 2.0 | 2295 | 28 | 20 |
|  | Disked | 48 | 37 | 77% | 23% | 6.0 | 1.3 | 4.6 | 1.5 | 833.9 | 23 | 14 |
|  | Sub-soiled | 48 | 45 | 94% | 6% | 6.9 | 1.0 | 5.9 | 2.1 | 1461 | 32 | 23 |
| 373 | Combined | 96 | 68 | 71% | 29% | 5.2 | 1.5 | 4.4 | 2.1 | 1313 | 19 | 21 |
|  | Disked | 48 | 26 | 54% | 46% | 4.9 | 1.1 | 3.9 | 1.9 | 398.5 | 15 | 15 |
|  | Sub-soiled | 48 | 42 | 88% | 13% | 5.3 | 1.6 | 4.7 | 2.3 | 914.4 | 22 | 24 |
| *P. deltoides* × *P. maximowiczii* | Combined | 96 | 90 | 94% | 6% | 5.5 | 1.2 | 4.8 | 1.6 | 2109 | 23 | 18 |
|  | Disked | 48 | 44 | 92% | 8% | 5.7 | 1.3 | 5.1 | 1.6 | 1136 | 26 | 14 |
|  | Sub-soiled | 48 | 46 | 96% | 4% | 5.4 | 1.1 | 4.6 | 1.5 | 973.6 | 21 | 20 |
| 230 | Combined | 96 | 90 | 94% | 6% | 5.5 | 1.2 | 4.8 | 1.6 | 2109 | 23 | 18 |
|  | Disked | 48 | 44 | 92% | 8% | 5.7 | 1.3 | 5.1 | 1.6 | 1136 | 26 | 14 |
|  | Sub-soiled | 48 | 46 | 96% | 4% | 5.4 | 1.1 | 4.6 | 1.5 | 973.6 | 21 | 20 |
| *P. trichocarpa* × *P. deltoides* | Combined | 480 | 414 | 86% | 14% | 5.0 | 1.2 | 4.2 | 1.8 | 6832 | 17 | 15 |
|  | Disked | 240 | 204 | 85% | 15% | 4.7 | 1.1 | 3.9 | 1.7 | 2824 | 14 | 13 |
|  | Sub-soiled | 240 | 210 | 88% | 13% | 5.2 | 1.3 | 4.5 | 1.9 | 4008 | 19 | 17 |
| 185 | Combined | 96 | 85 | 89% | 11% | 5.9 | 1.3 | 5.4 | 1.9 | 2483 | 30 | 21 |
|  | Disked | 48 | 39 | 81% | 19% | 5.7 | 1.1 | 5.3 | 1.9 | 1035 | 27 | 20 |
|  | Sub-soiled | 48 | 46 | 96% | 4% | 6.0 | 1.4 | 5.5 | 1.9 | 1448 | 33 | 22 |
| 187 | Combined | 96 | 81 | 84% | 16% | 4.2 | 0.93 | 3.1 | 1.2 | 546.0 | 6.7 | 4.9 |
|  | Disked | 48 | 42 | 88% | 13% | 4.2 | 0.85 | 3.0 | 1.1 | 273.0 | 6.5 | 4.4 |
|  | Sub-soiled | 48 | 39 | 81% | 19% | 4.2 | 1.0 | 3.2 | 1.3 | 273.0 | 7.0 | 5.3 |
| 188 | Combined | 96 | 78 | 81% | 19% | 4.6 | 1.3 | 3.8 | 1.9 | 921.3 | 12 | 11 |
|  | Disked | 48 | 39 | 81% | 19% | 4.2 | 1.0 | 3.2 | 1.2 | 278.6 | 7.1 | 5.2 |
|  | Sub-soiled | 48 | 39 | 81% | 19% | 5.0 | 1.4 | 4.4 | 2.3 | 642.6 | 16 | 14 |
| 229 | Combined | 96 | 93 | 97% | 3% | 5.2 | 0.86 | 4.7 | 1.5 | 1938 | 21 | 12 |
|  | Disked | 48 | 48 | 100% | 0% | 5.1 | 0.72 | 4.5 | 1.4 | 918.3 | 19 | 9.5 |
|  | Sub-soiled | 48 | 45 | 94% | 6% | 5.4 | 1.0 | 4.9 | 1.5 | 1019 | 23 | 14 |
| 339 | Combined | 96 | 79 | 82% | 18% | 4.8 | 1.1 | 4.1 | 1.7 | 943.9 | 12 | 11 |
|  | Disked | 48 | 36 | 75% | 25% | 4.3 | 1.0 | 3.5 | 1.4 | 319.4 | 8.9 | 7.1 |
|  | Sub-soiled | 48 | 43 | 90% | 10% | 5.2 | 0.95 | 4.6 | 1.7 | 624.5 | 15 | 12 |
| Overall | Combined | 960 | 809 | 84% | 16% | 5.4 | 1.4 | 7.2 | 2.6 | 17,474 | 22 | 19 |
|  | Disked | 480 | 385 | 80% | 20% | 5.2 | 1.3 | 7.1 | 2.6 | 7359 | 19 | 16 |
|  | Sub-soiled | 480 | 424 | 88% | 12% | 5.6 | 1.4 | 7.2 | 2.5 | 10,116 | 24 | 21 |

**Table S3.** Mean foliar nitrogen and one standard deviation (SD), phosphorous ± SD, potassium ± SD, magnesium ± SD, calcium ± SD, and sulfur ± SD for trees. Means are listed by overall performance (combined), and then partitioned by soil tillage treatment.

| **Genotype** | **Treatment** | ***n*** | | **% Nitrogen** | | **% Phosphorous** | | | **% Potassium** | | **% Magnesium** | | **% Calcium** | | **% Sulfur** | | |
| --- | --- | --- | --- | --- | --- | --- | --- | --- | --- | --- | --- | --- | --- | --- | --- | --- | --- |
| **Clone** | **Mean** | **SD** | **Mean** | **SD** | | **Mean** | **SD** | **Mean** | **SD** | **Mean** | **SD** | **Mean** | **SD** | |
| *P. deltoides* | Combined | 32 | | 2.79 | 0.33 | 0.25 | 0.07 | | 1.49 | 0.35 | 0.34 | 0.07 | 1.66 | 0.44 | 0.54 | 0.08 | |
|  | Disked | 16 | | 2.75 | 0.34 | 0.28 | 0.08 | | 1.54 | 0.28 | 0.34 | 0.06 | 1.57 | 0.37 | 0.56 | 0.06 | |
|  | Sub-soiled | 16 | | 2.84 | 0.32 | 0.23 | 0.05 | | 1.43 | 0.41 | 0.35 | 0.07 | 1.75 | 0.10 | 0.51 | 0.10 | |
| 140 | Combined | 8 | | 2.87 | 0.34 | 0.25 | 0.07 | | 1.43 | 0.28 | 0.33 | 0.08 | 1.79 | 0.40 | 0.53 | 0.03 | |
|  | Disked | 4 | | 2.62 | 0.17 | 0.25 | 0.08 | | 1.26 | 0.18 | 0.37 | 0.07 | 1.98 | 0.37 | 0.54 | 0.03 | |
|  | Sub-soiled | 4 | | 3.12 | 0.29 | 0.24 | 0.06 | | 1.60 | 0.28 | 0.29 | 0.08 | 1.60 | 0.28 | 0.52 | 0.03 | |
| 176 | Combined | 8 | | 2.81 | 0.42 | 0.24 | 0.05 | | 1.29 | 0.27 | 0.37 | 0.07 | 1.89 | 0.36 | 0.56 | 0.06 | |
|  | Disked | 4 | | 3.05 | 0.47 | 0.27 | 0.06 | | 1.52 | 0.09 | 0.30 | 0.02 | 1.58 | 0.17 | 0.58 | 0.08 | |
|  | Sub-soiled | 4 | | 2.58 | 0.18 | 0.21 | 0.01 | | 1.05 | 0.09 | 0.43 | 0.03 | 2.19 | 0.15 | 0.53 | 0.03 | |
| 356 | Combined | 8 | | 2.68 | 0.23 | 0.28 | 0.09 | | 1.84 | 0.35 | 0.33 | 0.06 | 1.44 | 0.40 | 0.56 | 0.09 | |
|  | Disked | 4 | | 2.54 | 0.06 | 0.30 | 0.13 | | 1.80 | 0.35 | 0.30 | 0.13 | 1.27 | 0.32 | 0.55 | 0.04 | |
|  | Sub-soiled | 4 | | 2.82 | 0.27 | 0.25 | 0.05 | | 1.88 | 0.39 | 0.36 | 0.06 | 1.61 | 0.43 | 0.58 | 0.13 | |
| 373 | Combined | 8 | | 2.82 | 0.33 | 0.25 | 0.06 | | 1.39 | 0.26 | 0.35 | 0.05 | 1.53 | 0.52 | 0.50 | 0.12 | |
|  | Disked | 4 | | 2.80 | 0.37 | 0.29 | 0.02 | | 1.58 | 0.19 | 0.38 | 0.06 | 1.45 | 0.20 | 0.59 | 0.07 | |
|  | Sub-soiled | 4 | | 2.82 | 0.27 | 0.25 | 0.05 | | 1.88 | 0.39 | 0.36 | 0.06 | 1.61 | 0.43 | 0.58 | 0.13 | |
| *P. trichocarpa* × *P. deltoides* | Combined | 40 | | 2.92 | 0.32 | 0.25 | 0.06 | | 1.53 | 0.24 | 0.26 | 0.07 | 1.03 | 0.23 | 0.33 | 0.06 | |
|  | Disked | 20 | | 2.88 | 0.38 | 0.27 | 0.07 | | 1.55 | 0.30 | 0.25 | 0.04 | 0.97 | 0.24 | 0.32 | 0.04 | |
|  | Sub-soiled | 20 | | 2.95 | 0.25 | 0.24 | 0.05 | | 1.52 | 0.17 | 0.27 | 0.97 | 1.09 | 0.22 | 0.34 | 0.07 | |
| 185 | Combined | 8 | | 2.81 | 0.18 | 0.28 | 0.06 | | 1.35 | 0.23 | 0.25 | 0.03 | 1.27 | 0.16 | 0.29 | 0.02 | |
|  | Disked | 4 | | 2.71 | 0.19 | 0.29 | 0.07 | | 1.38 | 0.30 | 0.26 | 0.02 | 1.28 | 0.24 | 0.29 | 0.02 | |
|  | Sub-soiled | 4 | | 2.92 | 0.18 | 0.28 | 0.06 | | 1.32 | 0.16 | 0.25 | 0.04 | 1.26 | 0.06 | 0.29 | 0.03 | |
| 187 | Combined | 8 | 3.22 | | 0.16 | 0.27 | 0.05 | 1.52 | | 0.24 | 0.23 | 0.05 | 0.94 | 0.14 | 0.32 | 0.02 |
|  | Disked | 4 | 3.16 | | 0.20 | 0.28 | 0.06 | 1.47 | | 0.36 | 0.26 | 0.06 | 0.93 | 0.19 | 0.32 | 0.02 |
|  | Sub-soiled | 4 | 3.29 | | 0.18 | 0.26 | 0.05 | 1.57 | | 0.04 | 0.20 | 0.02 | 0.95 | 0.08 | 0.32 | 0.03 |
| 188 | Combined | 8 | 3.12 | | 0.44 | 0.26 | 0.06 | 1.55 | | 0.32 | 0.30 | 0.12 | 1.13 | 0.25 | 0.38 | 0.09 |
|  | Disked | 4 | 3.23 | | 0.60 | 0.29 | 0.08 | 1.63 | | 0.45 | 0.24 | 0.02 | 0.95 | 0.21 | 0.34 | 0.05 |
|  | Sub-soiled | 4 | 3.00 | | 0.25 | 0.24 | 0.02 | 1.48 | | 0.16 | 0.36 | 0.14 | 1.31 | 0.13 | 0.42 | 0.11 |
| 229 | Combined | 8 | 2.64 | | 0.11 | 0.21 | 0.05 | 1.66 | | 0.16 | 0.21 | 0.05 | 0.80 | 0.11 | 0.30 | 0.02 |
|  | Disked | 4 | 2.56 | | 0.10 | 0.23 | 0.06 | 1.62 | | 0.19 | 0.23 | 0.03 | 0.78 | 0.14 | 0.31 | 0.03 |
|  | Sub-soiled | 4 | 2.71 | | 0.06 | 0.20 | 0.02 | 1.70 | | 0.14 | 0.22 | 0.04 | 0.81 | 0.09 | 0.30 | 0.01 |
| 339 | Combined | 8 | 2.80 | | 0.18 | 0.23 | 0.04 | 1.59 | | 0.14 | 0.31 | 0.07 | 1.03 | 0.18 | 0.36 | 0.04 |
|  | Disked | 4 | 2.76 | | 0.14 | 0.24 | 0.05 | 1.66 | | 0.16 | 0.28 | 0.04 | 0.94 | 0.17 | 0.35 | 0.05 |
|  | Sub-soiled | 4 | 2.83 | | 0.23 | 0.22 | 0.04 | 1.53 | | 0.08 | 0.35 | 0.07 | 1.12 | 0.17 | 0.38 | 0.04 |
| *P. deltoides* × *P. maximowiczii* | Combined | 8 | 2.76 | | 0.33 | 0.22 | 0.03 | 1.57 | | 0.12 | 0.30 | 0.05 | 1.08 | 0.27 | 0.37 | 0.02 |
|  | Disked | 4 | 2.68 | | 0.37 | 0.23 | 0.03 | 1.56 | | 0.07 | 0.29 | 0.02 | 1.07 | 0.28 | 0.37 | 0.03 |
|  | Sub-soiled | 4 | 2.85 | | 0.31 | 0.21 | 0.03 | 1.58 | | 0.17 | 0.31 | 0.08 | 1.09 | 0.29 | 0.37 | 0.03 |
| 230 | Combined | 8 | 2.76 | | 0.33 | 0.22 | 0.03 | 1.57 | | 0.12 | 0.30 | 0.05 | 1.08 | 0.27 | 0.37 | 0.02 |
|  | Disked | 4 | 2.68 | | 0.37 | 0.23 | 0.03 | 1.56 | | 0.07 | 0.29 | 0.02 | 1.07 | 0.28 | 0.37 | 0.03 |
|  | Sub-soiled | 4 | 2.85 | | 0.31 | 0.21 | 0.03 | 1.58 | | 0.17 | 0.31 | 0.08 | 1.09 | 0.29 | 0.37 | 0.03 |
| Overall | Combined | 80 | 2.85 | | 0.33 | 0.25 | 0.06 | 1.52 | | 0.28 | 0.29 | 0.08 | 1.29 | 0.45 | 0.42 | 0.12 |
|  | Disked | 40 | 2.81 | | 0.37 | 0.27 | 0.07 | 1.55 | | 0.27 | 0.29 | 0.06 | 1.22 | 0.41 | 0.42 | 0.13 |
|  | Sub-soiled | 40 | 2.89 | | 0.28 | 0.23 | 0.05 | 1.49 | | 0.29 | 0.31 | 0.09 | 1.35 | 0.48 | 0.41 | 0.11 |

**Table S**4. Mean Leaf Area Index (LAI) and one standard deviation (SD) collected in October 2014.

| **Genotype** | **Treatment** | ***n*** | **LAI** | |
| --- | --- | --- | --- | --- |
| **Clone** | **Mean** | **SD** |
| *P. deltoides* | Combined | 16 | 2.09 | 0.68 |
|  | Disked | 8 | 1.82 | 0.69 |
|  | Sub-soiled | 8 | 2.33 | 0.60 |
| 140 | Combined | 4 | 2.30 | 0.34 |
|  | Disked | 2 | 2.08 | 0.17 |
|  | Sub-soiled | 2 | 2.52 | 0.35 |
| 176 | Combined | 4 | 2.47 | 0.85 |
|  | Disked | 2 | 2.25 | 1.30 |
|  | Sub-soiled | 2 | 2.69 | 0.51 |
| 356 | Combined | 3 | 2.03 | 0.48 |
|  | Disked | 2 | 1.47 | 0.02 |
|  | Sub-soiled | 2 | 2.31 | 0.02 |
| 373 | Combined | 4 | 1.55 | 0.71 |
|  | Disked | 2 | 1.39 | 0.03 |
|  | Sub-soiled | 2 | 1.81 | 1.12 |
| *P. trichocarpa* × *P. deltoides* | Combined | 20 | 1.36 | 0.48 |
|  | Disked | 10 | 1.52 | 0.51 |
|  | Sub-soiled | 10 | 1.21 | 0.43 |
| 185 | Combined | 4 | 2.04 | 0.32 |
|  | Disked | 2 | 1.81 | 0.27 |
|  | Sub-soiled | 2 | 2.27 | 0.15 |
| 187 | Combined | 4 | 1.02 | 0.35 |
|  | Disked | 2 | 0.94 | 0.57 |
|  | Sub-soiled | 2 | 1.11 | 0.07 |
| 188 | Combined | 4 | 1.12 | 0.21 |
|  | Disked | 2 | 1.11 | 0.29 |
|  | Sub-soiled | 2 | 1.13 | 0.22 |
| 229 | Combined | 4 | 1.56 | 0.37 |
|  | Disked | 2 | 1.28 | 0.17 |
|  | Sub-soiled | 2 | 1.84 | 0.28 |
| 339 | Combined | 4 | 1.09 | 0.26 |
|  | Disked | 2 | 0.93 | 0.23 |
|  | Sub-soiled | 2 | 1.25 | 0.22 |
| *P. deltoides* × *P. maximowiczii* | Combined | 4 | 1.50 | 0.31 |
|  | Disked | 2 | 1.60 | 0.10 |
|  | Sub-soiled | 2 | 1.45 | 0.42 |
| 230 | Combined | 4 | 1.50 | 0.31 |
|  | Disked | 2 | 1.60 | 0.10 |
|  | Sub-soiled | 2 | 1.45 | 0.42 |
| Overall | Combined | 39 | 1.65 | 0.65 |
|  | Disked | 18 | 1.47 | 0.60 |
|  | Sub-soiled | 21 | 1.80 | 0.66 |


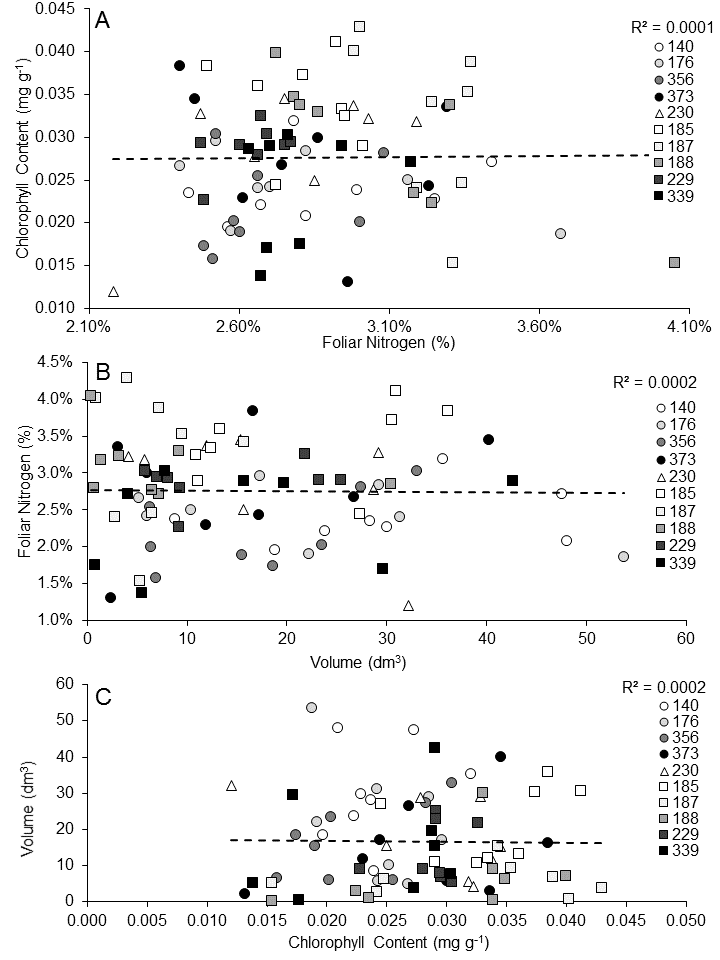


**Figure S1.** Cross-plots of (**A**) chlorophyll content (mg·g−1) *vs.* foliar nitrogen (%); (**B**) foliar nitrogen (%), *vs.* volume index (dm3); and (**C**) volume index (dm3) *vs*. chlorophyll content (mg·g−1) for *Populus* genotypes. Circles (Ο) represent *P. deltoides* genotypes, triangles (Δ) represent a *P. deltoides × P. maximowiczii* genotype, and squares(□) represent *P. trichocarpa × P. deltoides* genotypes. Trend lines are shown as dashed lines. *R*2 values are located in the top right of each cross plot.
